# Supplementary material
Source: Springer Nature journal article supplement (https://www.springermedizin.de/resource/supplementary/12889_2013_6556_MOESM3_ESM.pdf/9498500)

# BMI Distributions by measurement type - Females

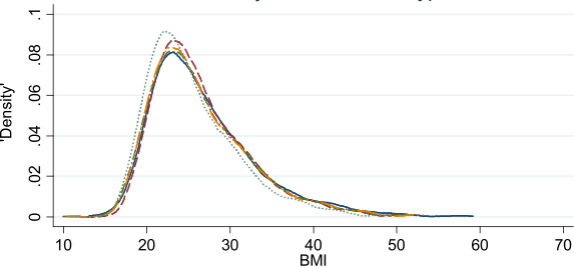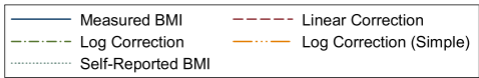

Supplement: MOESM3 [file 9498500]
